# Supplementary material for: Proteomic profiling improves prognostic risk stratification of the Sarculator nomogram in soft tissue sarcomas of the extremities and trunk wall
Source: PubMed Central journal article supplement (PMC11263812; doi:10.1002/cam4.70026), 2024-07-23

A

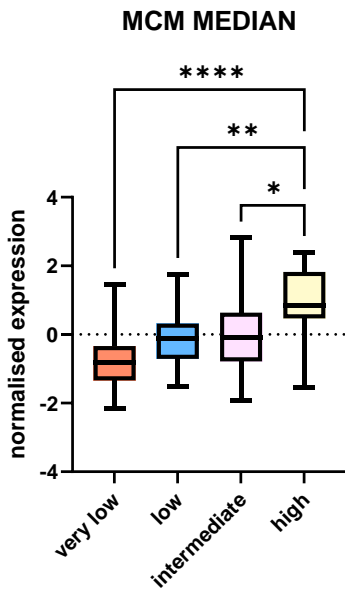

B

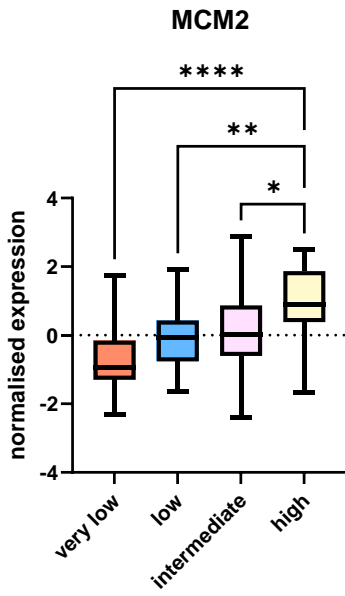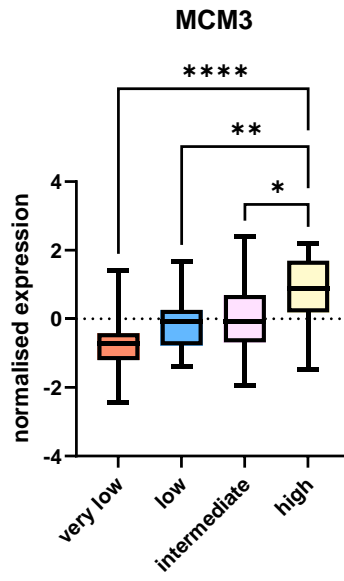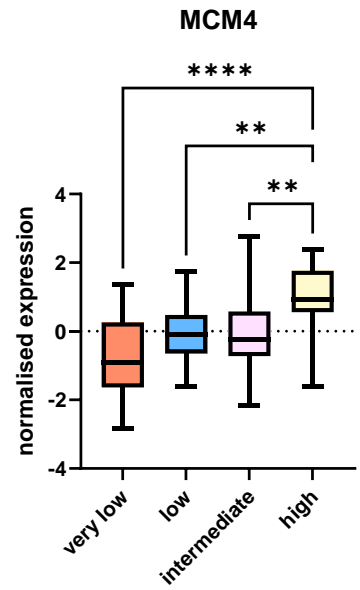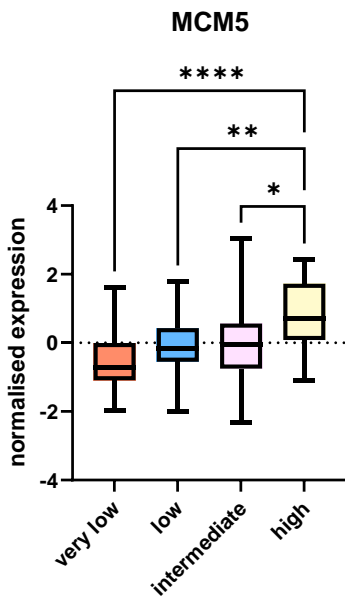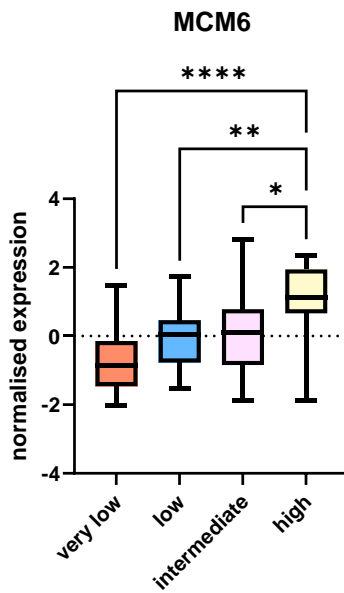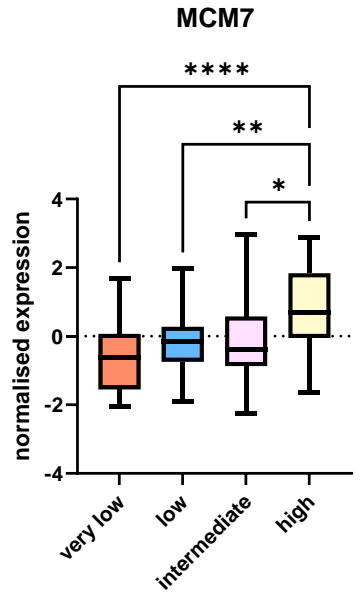

Supplement: CAM4-13-e70026-s004.pdf [file CAM4-13-e70026-s004.pdf]
