# Supplementary material for: Proteomic profiling improves prognostic risk stratification of the Sarculator nomogram in soft tissue sarcomas of the extremities and trunk wall
Source: PubMed Central journal article supplement (PMC11263812; doi:10.1002/cam4.70026), 2024-07-23
Supplement: CAM4-13-e70026-s008.pdf [file CAM4-13-e70026-s008.pdf]

**A**

Proteomics cohort

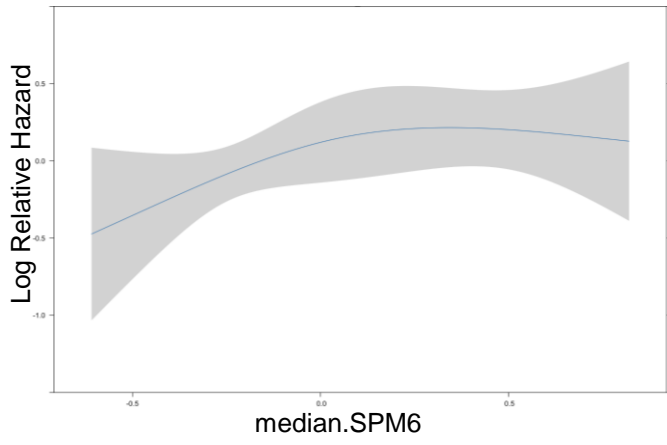**B**

TCGA cohort

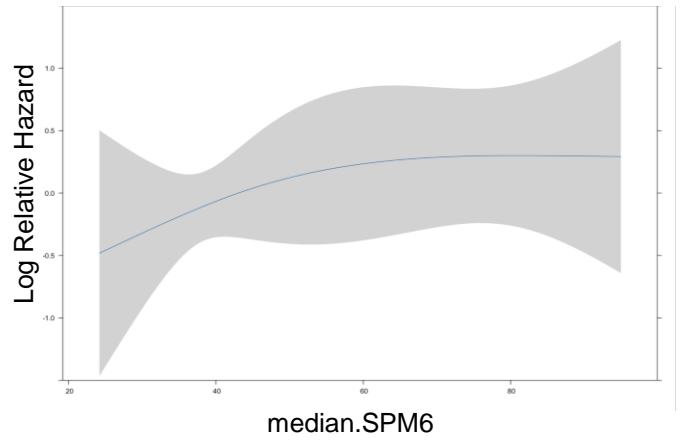**C**

Proteomics cohort

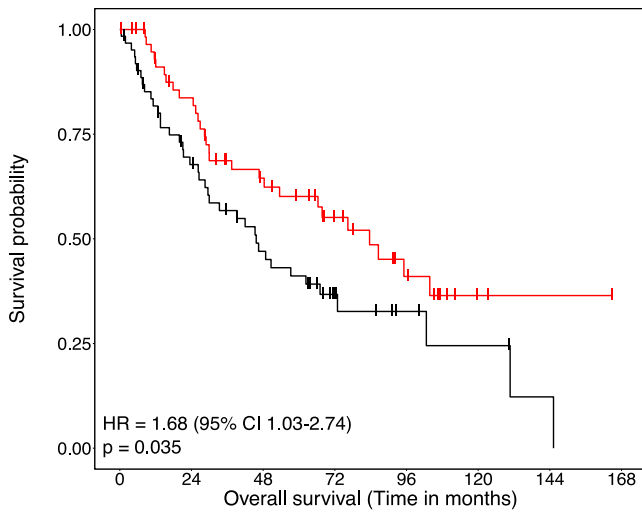

Number at risk

|           |    |    |    |    |    |   |   |   |
|-----------|----|----|----|----|----|---|---|---|
| SPM6 high | 62 | 38 | 24 | 12 | 5  | 3 | 1 | 0 |
| SPM6 low  | 61 | 45 | 30 | 19 | 10 | 2 | 1 | 0 |

**D**

TCGA cohort

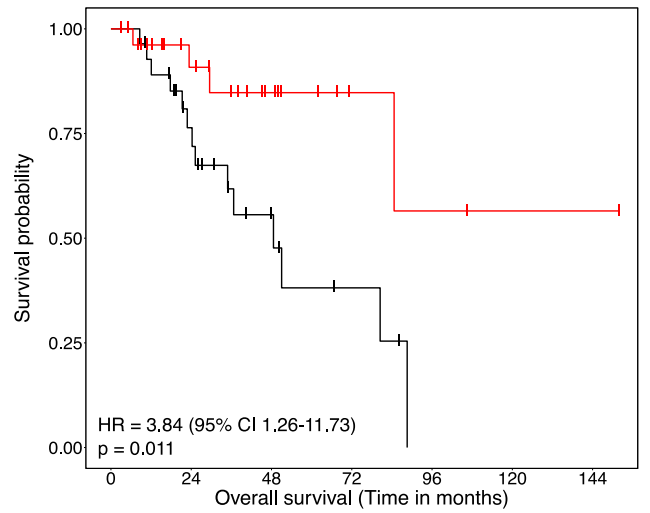

Number at risk

|           |    |    |   |   |   |   |   |
|-----------|----|----|---|---|---|---|---|
| SPM6 high | 28 | 17 | 7 | 3 | 0 | 0 | 0 |
| SPM6 low  | 28 | 17 | 9 | 3 | 2 | 1 | 1 |
